# Supplementary material for: A single-cell atlas of pig gastrulation as a resource for comparative embryology
Source: PubMed Central journal article supplement (PMC11189408; doi:10.1038/s41467-024-49407-6), 2024-06-18
Supplement: 41467_2024_49407_MOESM3_ESM.pdf [file 41467_2024_49407_MOESM3_ESM.pdf]

## **Description of Additional Supplementary Files**

**File Name:** Supplementary Data 1

**Description:** A referenced list of markers used for cell type identification.

**File Name:** Supplementary Data 2

**Description:** Top markers of cell types identified in this paper. The differential expression analysis presented was performed using the FindAllMarkers function from the Seurat package which uses a two-sided Wilcoxon Rank Sum test. P-values were adjusted for multiple testing using the Bonferroni correction method.

**File Name:** Supplementary Data 3

**Description:** Top markers of cell subtypes identified in this paper. The differential expression analysis presented was performed using the FindAllMarkers function from the Seurat package which uses a two-sided Wilcoxon Rank Sum test. P-values were adjusted for multiple testing using the Bonferroni correction method.

**File Name:** Supplementary Data 4

**Description:** Conserved and divergent markers of cell types between pig and monkey embryos. The analysis presented was performed using the FindConservedMarkers function from the Seurat package which uses a two-sided Wilcoxon Rank Sum test. P-values were adjusted for multiple testing using the Bonferroni correction method.

**File Name:** Supplementary Data 5

**Description:** Conserved and divergent markers of cell types between pig and mouse embryos. The analysis presented was performed using the FindConservedMarkers function from the Seurat package which uses a two-sided Wilcoxon Rank Sum test. P-values were adjusted for multiple testing using the Bonferroni correction method.

**File Name:** Supplementary Data 6

**Description:** Conserved and divergent markers of cell types between mouse and monkey embryos. The analysis presented was performed using the FindConservedMarkers function from the Seurat package which uses a two-sided Wilcoxon Rank Sum test. P-values were adjusted for multiple testing using the Bonferroni correction method.

**File Name:** Supplementary Data 7

**Description:** Differentially expressed genes in FOXA2, NANOG, TBXT and SOX17 expressing pig embryonic cells. The differential expression analysis presented was performed using the FindAllMarkers function from the Seurat package which uses a two-sided Wilcoxon Rank Sum test. P-values were adjusted for multiple testing using the Bonferroni correction method.

**File Name:** Supplementary Data 8

**Description:** Differentially expressed genes in FOXA2, NANOG, TBXT and SOX17 expressing mouse embryonic cells. The differential expression analysis presented was performed using the FindAllMarkers function from the Seurat package which uses a two-sided Wilcoxon Rank Sum test. P-values were adjusted for multiple testing using the Bonferroni correction method.

**File Name:** Supplementary Data 9

**Description:** Differentially expressed genes in endodermal subtypes across all time points in pig embryos. The differential expression analysis presented was performed using the FindAllMarkers function from the Seurat package which uses a two-sided Wilcoxon Rank Sum test. P-values were adjusted for multiple testing using the Bonferroni correction method.

**File Name:** Supplementary Data 10

**Description:** Differentially expressed genes in mature endodermal subtypes across E14-E15 in pig embryos. The differential expression analysis presented was performed using the FindAllMarkers function from the Seurat package which uses a two-sided Wilcoxon Rank Sum test. P-values were adjusted for multiple testing using the Bonferroni correction method.

**File Name:** Supplementary Movie 1

**Description:** A lateral fly-through of an E11.5 pig embryo stained for FOXA2, TBXT and DAPI (Embryo 1).

**File Name:** Supplementary Movie 2

**Description:** A lateral fly-through of an E11.5 pig embryo stained for FOXA2, TBXT and DAPI (Embryo 2).

**File Name:** Supplementary Movie 3

**Description:** A lateral fly-through of an E11.5 pig embryo stained for FOXA2, TBXT and DAPI (Embryo 3).
